# Supplementary material for: Cultural Divergence in Psychedelic Use among Medical Students: An ESPAD-Adapted Survey among Poles and Iraqis
Source: MDPI journal article supplement (doi:10.3390/ejihpe14030038), 2024-03-05
Supplement: s1 [file s1]

Table S1. The English version of the ESPAD-adapted survey.

1. What is your sex?
  - ☐ Male
  - ☐ Female
2. What is your age?
  - ☐ Adolescent (10-19)
  - ☐ Young adult (20-39)
  - ☐ Middle-aged (40-60)
3. Concerning your religious affiliations, what is your status?
  - ☐ I believe in my religion, and I practice it
  - ☐ I believe in my religion, but I do not practice it
  - ☐ I do not believe in my religion, but I practice it
  - ☐ I do not believe in my religion, and I do not practice it
4. What is the financial income status of your family?
  - ☐ Low income
  - ☐ Middle income
  - ☐ High income
5. What is your Nationality (**text box**)?
6. Where do you live?
  - ☐ Urban area
  - ☐ Rural area
7. Which of the following best describes your academic performance at the end of the last term?
  - ☐ High
  - ☐ Average
  - ☐ Low
8. During the LAST 30 DAYS, how many days have you missed one or more classes?

|                     | None | 1 day | 2 days | 3-4 days | 5-6 days | ≥7 days |
|---------------------|------|-------|--------|----------|----------|---------|
| Because of illness  |      |       |        |          |          |         |
| Because you skipped |      |       |        |          |          |         |
| For other reasons   |      |       |        |          |          |         |

9. How often do you do each of the following?

|                                                                                                    | Never | A few times<br>a year | Once or twice<br>a month | At least once<br>a week | Almost<br>every day |
|----------------------------------------------------------------------------------------------------|-------|-----------------------|--------------------------|-------------------------|---------------------|
| Play computer and video games                                                                      |       |                       |                          |                         |                     |
| Actively participate in sports, athletics,<br>or exercising                                        |       |                       |                          |                         |                     |
| Read books for enjoyment (do not count<br>schoolbooks)                                             |       |                       |                          |                         |                     |
| Go out in the evening (to a disco, cafe,<br>party, etc.)                                           |       |                       |                          |                         |                     |
| Other hobbies (playing an instrument,<br>singing, drawing, writing)                                |       |                       |                          |                         |                     |
| Go around with friends to shopping<br>centers, parks, etc.                                         |       |                       |                          |                         |                     |
| Use the internet for leisure activities<br>(chats, music, games, social<br>networks, videos, etc.) |       |                       |                          |                         |                     |
| Play on slot machines (the kind in<br>which you may win money)                                     |       |                       |                          |                         |                     |

10. What is the highest level of education your father completed?

- ☐ Completed primary school or less
- ☐ Completed secondary school
- ☐ Completed college or university
- ☐ Don't know

11. What is the highest level of education your mother completed?

- ☐ Completed primary school or less
- ☐ Completed secondary school
- ☐ Completed college or university
- ☐ Don't know

12. How often do the following statements apply to you?

|                                                                      | Almost<br>always | Often | Sometimes | Seldom | Almost<br>never |
|----------------------------------------------------------------------|------------------|-------|-----------|--------|-----------------|
| My parent(s) set definite rules about what I can do at home          |                  |       |           |        |                 |
| My parent(s) set definite rules about what I can do outside the home |                  |       |           |        |                 |
| My parent(s) know whom I am with during the evenings                 |                  |       |           |        |                 |
| My parent(s) know where I am during the evenings                     |                  |       |           |        |                 |
| I can easily borrow money from my mother and/or father               |                  |       |           |        |                 |
| I can easily get money as a gift from my mother and/or father        |                  |       |           |        |                 |

13. Indicate how you feel about each statement.

|                                                            | Very strongly<br>disagree | 2 | 3 | 4 | 5 | 6 | Very strongly<br>agree |
|------------------------------------------------------------|---------------------------|---|---|---|---|---|------------------------|
| My family really tries to help me                          |                           |   |   |   |   |   |                        |
| I get the emotional help and support I need from my family |                           |   |   |   |   |   |                        |
| I can talk about my problems with my family                |                           |   |   |   |   |   |                        |
| My family is willing to help me make decisions             |                           |   |   |   |   |   |                        |

14. Does your parents or family know where you spend your weekend nights?

- ☐ Know always
- ☐ Know quite often
- ☐ Know sometimes
- ☐ Usually don't know

15. How satisfied are you usually with ...

|                                      | Very<br>satisfied | Satisfied | Neither<br>nor | Not so<br>satisfied | Not at all<br>satisfied | There is no<br>such person |
|--------------------------------------|-------------------|-----------|----------------|---------------------|-------------------------|----------------------------|
| Your relationship with your mother?  |                   |           |                |                     |                         |                            |
| Your relationship with your father?  |                   |           |                |                     |                         |                            |
| Your relationship with your friends? |                   |           |                |                     |                         |                            |

16. Do you smoke cigarettes or tobacco?

- ☐ Yes
- ☐ No

17. Do you drink alcohol or alcoholic beverages?
- ☐ No
  - ☐ Seldom
  - ☐ Sometimes
  - ☐ Often
18. Have you heard about psychedelics, also known as hallucinogens and entheogens?
- ☐ Yes
  - ☐ No
19. How would you define psychedelics (**single answer**)?
- ☐ Psychedelics are CNS depressants and cannot be prescribed for individuals with depression
  - ☐ Psychedelics are psychoactive substances that alter consciousness and cognitive processes
  - ☐ Psychedelics are anti-inflammatory agents used for treating medical conditions
  - ☐ Psychedelics are principally used in general anesthesia and for treating epilepsy
20. Which of the following are psychedelics (**multiple answers**)?
- ☐ Psilocybin
  - ☐ Morphine
  - ☐ Tramadol
  - ☐ Lysergic acid diethylamide (LSD)
  - ☐ Dopamine
  - ☐ Amphetamine
  - ☐ Ayahuasca
  - ☐ Paracetamol
  - ☐ Dimethyltryptamine (DMT)
21. Have you ever used psychedelics?
- ☐ Never
  - ☐ Yes, in the last 30 days
  - ☐ Yes, in the last 12 months
  - ☐ Yes, more than 12 months ago
22. Why did you try psychedelics for the first time?
- ☐ I have never tried psychedelics
  - ☐ Out of curiosity
  - ☐ Because my friends/other people offered psychedelics to me
  - ☐ To relieve stress
  - ☐ Other reasons
23. How difficult do you think it would be for you to get psychedelics if you wanted?
- ☐ Impossible
  - ☐ Very difficult
  - ☐ Fairly difficult
  - ☐ Fairly easy
  - ☐ Very easy
  - ☐ Don't know
24. How difficult do you think it would be for you to get cannabis if you wanted?
- ☐ Impossible
  - ☐ Very difficult
  - ☐ Fairly difficult
  - ☐ Fairly easy
  - ☐ Very easy
  - ☐ Don't know
25. In your opinion, what is the level of risk regarding the

|                               | No risk | Low risk | Moderate risk | High risk | Don't know |
|-------------------------------|---------|----------|---------------|-----------|------------|
| Use of cannabis once or twice |         |          |               |           |            |

|                                   |  |  |  |  |  |
|-----------------------------------|--|--|--|--|--|
| Use of cannabis occasionally      |  |  |  |  |  |
| Use of cannabis regularly         |  |  |  |  |  |
| Use of psychedelics once or twice |  |  |  |  |  |
| Use of psychedelics occasionally  |  |  |  |  |  |
| Use of psychedelics regularly     |  |  |  |  |  |

26. Have you ever used cannabis or psychedelics to improve your academic performance?
- ☐ No  
☐ Yes
27. What is your own opinion on psychedelics (**text box**)?
28. Which of these adverse effects of psychedelics are you aware of (**multiple answers & text box**)?
- ☐ Dilated pupils and photosensitivity  
☐ Dermatitis (eczema)  
☐ Increased heart rate and blood pressure  
☐ Motor coordination problems  
☐ Venous leg ulcers  
☐ Gastrointestinal upset, including nausea and vomiting  
☐ Trigeminal neuralgia  
☐ Respiratory arrest  
☐ Hemorrhagic fever  
☐ Loss of consciousness or coma  
☐ Disseminated intravascular coagulation  
☐ Drug-induced psychosis  
☐ Septic shock  
☐ Hallucinogen-Persisting Perception Disorder  
☐ Others (**text box**)

**Q29–Q31 ARE ONLY FOR CANNABIS OR PSYCHEDELICS USERS**

29. On how many occasions have you used psychedelics?

|                           | A Few times | Sometimes | Frequently |
|---------------------------|-------------|-----------|------------|
| In your lifetime          |             |           |            |
| During the last 12 months |             |           |            |
| During the last 30 days   |             |           |            |

30. On how many occasions have you used cannabis?

|                           | A Few times | Sometimes | Frequently |
|---------------------------|-------------|-----------|------------|
| In your lifetime          |             |           |            |
| During the last 12 months |             |           |            |
| During the last 30 days   |             |           |            |

31. If you ever used cannabis or any psychedelics, where did you get the substance(s) from?

- ☐ Offered by a family member  
☐ By a street dealer  
☐ Through the Internet  
☐ From a friend or a distant acquaintance  
☐ By courier or mail  
☐ Others

Table S2. Socio-demographic and socio-cultural differences between Poles and Iraqis.

| Variable (Survey Question)                    |             | p-value            | Odds Ratio | 95% Confidence Interval |              |
|-----------------------------------------------|-------------|--------------------|------------|-------------------------|--------------|
| Age                                           | Iraq/Poland | Junior Students    | <0.001     | 6.45                    | 3.92 10.61   |
|                                               |             | Senior Students    |            |                         |              |
| Religious Stance                              | Iraq/Poland | Present            | <0.001     | 18.01                   | 12.44 26.08  |
|                                               |             | Absent             |            |                         |              |
| Residence                                     | Iraq/Poland | Urban              | <0.001     | 1.13                    | 1.06 1.20    |
|                                               |             | Rural              |            |                         |              |
| Academic performance (in last semester)       | Iraq/Poland | Average/Low        | <0.001     | 1.90                    | 1.39 2.60    |
|                                               |             | High               |            |                         |              |
| Missing classes (because of illness)          | Iraq/Poland | Yes                | <0.001     | 3.70                    | 2.59 5.26    |
|                                               |             | No                 |            |                         |              |
| Missing classes (intentional)                 | Iraq/Poland | Yes                | <0.001     | 5.68                    | 4.07 8.00    |
|                                               |             | No                 |            |                         |              |
| Missing classes (other reasons)               | Iraq/Poland | Yes                | <0.001     | 3.62                    | 2.63 5.00    |
|                                               |             | No                 |            |                         |              |
| Playing videogames                            | Iraq/Poland | Yes                | 0.015      | 1.47                    | 1.08 2.01    |
|                                               |             | No                 |            |                         |              |
| Participating in Sports                       | Poland/Iraq | Yes                | <0.001     | 10.97                   | 6.07 19.82   |
|                                               |             | No                 |            |                         |              |
| Reading cultural books                        | Poland/Iraq | Yes                | <0.001     | 5.76                    | 3.49 9.49    |
|                                               |             | No                 |            |                         |              |
| Going out in the evening                      | Poland/Iraq | Yes                | <0.001     | 5.87                    | 3.14 10.98   |
|                                               |             | No                 |            |                         |              |
| Playing an instrument (or other hobbies)      | Poland/Iraq | Yes                | <0.001     | 4.51                    | 3.11 6.53    |
|                                               |             | No                 |            |                         |              |
| Going around (with friends)                   | Poland/Iraq | Yes                | <0.001     | 3.20                    | 1.63 6.30    |
|                                               |             | No                 |            |                         |              |
| Using the internet (for leisure activities)   | Poland/Iraq | Yes                | 0.001      | 13.92                   | 1.85 104.843 |
|                                               |             | No                 |            |                         |              |
| Father's educational level                    | Poland/Iraq | >=Secondary school | 0.028      | 2.24                    | 1.08 4.67    |
|                                               |             | <=Primary school   |            |                         |              |
| Mother's educational level                    | Poland/Iraq | >=Secondary school | <0.001     | 5.88                    | 2.63 13.16   |
|                                               |             | <=Primary school   |            |                         |              |
| Parents set definite rules (outside home)     | Iraq/Poland | Yes                | <0.001     | 6.17                    | 4.46 8.48    |
|                                               |             | No                 |            |                         |              |
| Parents know (whom I am with in the evenings) | Iraq/Poland | Yes                | <0.001     | 5.35                    | 3.27 8.77    |
|                                               |             | No                 |            |                         |              |
| Parents know (where I am in the evenings)     | Iraq/Poland | Yes                | <0.001     | 5.08                    | 3.15 8.20    |
|                                               |             | No                 |            |                         |              |
| I can easily borrow money (from parents)      | Iraq/Poland | Yes                | 0.007      | 2.11                    | 1.22 3.66    |
|                                               |             | No                 |            |                         |              |
| I get emotional support I need (from family)  | Iraq/Poland | Yes                | 0.001      | 1.73                    | 1.26 2.37    |
|                                               |             | No                 |            |                         |              |
| My family helps me make decisions             | Iraq/Poland | Yes                | 0.001      | 1.73                    | 1.26 2.37    |
|                                               |             | No                 |            |                         |              |
| Parents know (where I spend weekend nights)   | Iraq/Poland | Yes                | <0.001     | 6.63                    | 3.47 12.66   |
|                                               |             | No                 |            |                         |              |
| Satisfaction (relationship with mother)       | Iraq/Poland | Yes                | 0.007      | 1.64                    | 1.14 2.34    |
|                                               |             | No                 |            |                         |              |
| Satisfaction (relationship with father)       | Iraq/Poland | Yes                | <0.001     | 3.14                    | 2.27 4.35    |
|                                               |             | No                 |            |                         |              |

|                                             |             |           |        |        |        |        |
|---------------------------------------------|-------------|-----------|--------|--------|--------|--------|
| Satisfaction<br>(relationship with friends) | Poland/Iraq | Yes       | 0.003  | 1.78   | 1.21   | 2.62   |
|                                             |             | No        |        |        |        |        |
| Smoking cigarettes or tobacco               | Poland/Iraq | Yes       | <0.001 | 2.45   | 1.68   | 3.58   |
|                                             |             | No        |        |        |        |        |
| Drinking alcohol                            | Poland/Iraq | Yes       | <0.001 | 180.44 | 100.17 | 325.04 |
|                                             |             | No        |        |        |        |        |
| Have you heard about<br>psychedelics?       | Poland/Iraq | Yes       | <0.001 | 7.96   | 4.75   | 13.36  |
|                                             |             | No        |        |        |        |        |
| How would you define<br>psychedelics?       | Poland/Iraq | Yes       | <0.001 | 42.37  | 19.56  | 91.78  |
|                                             |             | No        |        |        |        |        |
| Have you ever used<br>psychedelics?         | Poland/Iraq | Yes       | <0.001 | 23.07  | 9.18   | 57.99  |
|                                             |             | No        |        |        |        |        |
| Difficulty of getting psychedelics          | Poland/Iraq | Easy      | <0.001 | 2.16   | 1.59   | 2.94   |
|                                             |             | Difficult |        |        |        |        |
| Difficulty of getting cannabis              | Poland/Iraq | Easy      | <0.001 | 9.08   | 6.13   | 13.45  |
|                                             |             | Difficult |        |        |        |        |
| Cannabis risk of use, once or<br>twice      | Poland/Iraq | Low risk  | <0.001 | 4.03   | 2.89   | 5.62   |
|                                             |             | High risk |        |        |        |        |
| Cannabis risk of use, occasionally          | Poland/Iraq | Low risk  | <0.001 | 2.47   | 1.83   | 3.33   |
|                                             |             | High risk |        |        |        |        |
| Psychedelics risk of use, once or<br>twice  | Poland/Iraq | Low risk  | 0.054  | 1.33   | 0.99   | 1.79   |
|                                             |             | High risk |        |        |        |        |
| Psychedelics use as cognitive<br>enhancers  | Poland/Iraq | Yes       | 0.003  | 12.44  | 1.57   | 98.71  |
|                                             |             | No        |        |        |        |        |
| Opinion on psychedelics                     | Poland/Iraq | Positive  | 0.006  | 1.51   | 1.13   | 2.02   |
|                                             |             | Negative  |        |        |        |        |
